# Supplementary material
Source: PubMed Central journal article supplement (PMC9278990)
Supplement: NIHMS1807985-supplement-Supplementary_Material.pdf [file NIHMS1807985-supplement-Supplementary_Material.pdf]

---

**Supplementary information**

---

**The tumor suppressor folliculin inhibits lactate dehydrogenase A and regulates the Warburg effect**

---

In the format provided by the authors and unedited

**Supplementary Table 2. Limited Proteolytic analysis of LDHA.**

| Limited Proteolysis peptides |                  |                      |
|------------------------------|------------------|----------------------|
| Protein (position)           | Sequence         | Condition            |
| LDHA (91-99)                 | LVIITAGAR        | FLCN-10 peptide only |
| LDHA (213-228)               | TLHPDLGTDKDKEQWK | Untreated only       |
| LDHA (306-315)               | VTLTSEEEAR       | Both conditions      |
| LDHA (318-328)               | KSADTLWGICK      | Both conditions      |

**Supplementary Table 3. KEY RESOURCES TABLE**

| REAGENT or RESOURCE           | SOURCE                    | IDENTIFIER                            |
|-------------------------------|---------------------------|---------------------------------------|
| Antibodies                    |                           |                                       |
| Rabbit anti-FLAG tag          | Thermo Scientific         | Cat# PA1-984B;<br>RRID:AB_347227      |
| Mouse anti-GAPDH (1D4)        | Enzo Life Sciences        | Cat# ADI-CSA-335;<br>RRID:AB_10617247 |
| Rabbit anti-FLCN (D14G9)      | Cell Signaling Technology | Cat# 3697; RRID:AB_2231646            |
| Rabbit anti-FLCN              | Novus Bio                 | Cat# NBP1-44995;<br>RRID:AB_10008586  |
| Rabbit anti-HA tag (C29F4)    | Cell Signaling Technology | Cat# 3724; RRID:AB_1549585            |
| Rabbit anti-LDHA              | Abcam                     | Cat# ab47010;<br>RRID:AB_1952042      |
| Mouse anti-LDHA (E-9)         | Santa Cruz Biotechnology  | Cat# sc-137243;<br>RRID:AB_2137192    |
| Rabbit anti-LDHB (431.1)      | Santa Cruz Biotechnology  | Cat# sc-100775;<br>RRID:AB_1124720    |
| Rabbit anti-phosphoTyr10-LDHA | Cell Signaling Technology | Cat# 8176;<br>RRID:AB_11220238        |
| Rabbit anti-cleaved Caspase-3 | Cell Signaling Technology | Cat# 9664;RRID:AB_2070042             |
| Rabbit anti-cleaved PARP      | Cell Signaling Technology | Cat# 5625;<br>RRID:AB_10699459        |
| Anti-mouse secondary          | Cell Signaling Technology | Cat# 7076; RRID:AB_330924             |
| Anti-rabbit secondary         | Cell Signaling Technology | Cat# 7074; RRID:AB_2099233            |

|                                               |                         |                                         |
|-----------------------------------------------|-------------------------|-----------------------------------------|
| Anti-mouse Alexa Fluor 647 secondary          | ThermoFisher Scientific | Cat# A-21236,<br>RRID:AB_2535805        |
| Anti-rabbit Alexa Fluor 488 secondary         | ThermoFisher Scientific | Cat# A-11034;<br>RRID:AB_2576217        |
| Bacterial and Virus Strains                   |                         |                                         |
| BL21(DE3)                                     | New England BioLabs     | Cat# C25271                             |
| Biological Samples                            |                         |                                         |
| Chemicals, Peptides, and Recombinant Proteins |                         |                                         |
| Sodium Pyruvate                               | Millipore-Sigma         |                                         |
| Sodium lactate                                | Millipore-Sigma         |                                         |
| Critical Commercial Assay Reagents            |                         |                                         |
| Mirus TransIT-2020                            | MirusBio                | Cat# MIR5405                            |
| Anti-FLAG M2 affinity gel                     | Sigma-Aldrich           | Cat# A2220;<br>RRID:AB_10063035         |
| Anti-HA agarose                               | ThermoFisher Scientific | Cat# 26182;<br>RRID:AB_2532162          |
| Protein G agarose                             | ThermoFisher Scientific | Cat# 15-920-010                         |
| Ni-NTA Agarose                                | ThermoFisher Scientific | Cat# 88221                              |
| ProLong Gold antifade reagent with DAPI       | ThermoFisher Scientific | Cat# P36935                             |
| Experimental Models: Cell Lines               |                         |                                         |
| HEK293                                        | ATCC                    | Cat# CRL-1573;<br>RRID:CVCL_0045        |
| HAP1 Parental                                 | Horizon Discovery       | Cat# C631; RRID:CVCL_Y019               |
| HAP1 <i>LDHA</i> -                            | Horizon Discovery       | Cat# HZGHC004917c002;<br>RRID:CVCL_SV40 |

|                    |                                            |                                         |
|--------------------|--------------------------------------------|-----------------------------------------|
| HAP1 <i>LDHB</i> - | Horizon Discovery                          | Cat# HZGHC005907c010;<br>RRID:CVCL_SV42 |
| UOK257             | Laura S. Schmidt and<br>W. Marston Linehan | RRID:CVCL_S717                          |
| UOK257-2           | Laura S. Schmidt and<br>W. Marston Linehan | RRID:CVCL_1D69                          |
| PC3                | ATCC                                       | Cat# CRL-1435;<br>RRID:CVCL_0035        |
| 786-O              | ATCC                                       | Cat# CRL-1932;<br>RRID:CVCL_1051        |
| A498               | ATCC                                       | Cat# HTB-44;<br>RRID:CVCL_1056          |
| Caki-1             | ATCC                                       | Cat# HTB-46;<br>RRID:CVCL_0234          |
| Caki-2             | ATCC                                       | Cat# HTB-47;<br>RRID:CVCL_0235          |
| LNCaP              | ATCC                                       | Cat# CRL-1740;<br>RRID:CVCL_1379        |
| Du145              | ATCC                                       | Cat# HTB-81;<br>RRID:CVCL_0105          |
| RT4                | ATCC                                       | Cat# HTB-2;RRID:CVCL_0036               |
| J82                | ATCC                                       | Cat# HTB-1;RRID:CVCL_0359               |
| T24                | ATCC                                       | Cat# HTB-4;RRID:CVCL_0554               |
| UM-UC-3            | ATCC                                       | Cat# CRL-1749;<br>RRID:CVCL_1783        |
| SW780              | ATCC                                       | Cat# CRL-2169;<br>RRID:CVCL_1728        |
| MDA-MB-231         | ATCC                                       | Cat# CRL-12532;<br>RRID:CVCL_0062       |

|                           |                                                                             |                                  |
|---------------------------|-----------------------------------------------------------------------------|----------------------------------|
| H1299                     | ATCC                                                                        | Cat# CRL-5803;<br>RRID:CVCL_0060 |
| A-549                     | ATCC                                                                        | Cat# CRL-7909;<br>RRID:CVCL_0023 |
| HT29                      | ATCC                                                                        | Cat# HTB-38;<br>RRID:CVCL_0320   |
| Oligonucleotides          |                                                                             |                                  |
| DNA primers               | Eurofins Genomics                                                           |                                  |
| FLCN FLAG BamHI F 174-344 | TATGCG GGATCC ATG gattacaaggatgacgacgataag GGA<br>ACCATCATGATGGACCGGATCT    |                                  |
| FLCN FLAG BamHI F 100-300 | TATGCG GGATCC ATG gattacaaggatgacgacgataag GGA<br>AAAGAGACCTCCATTAATAACG    |                                  |
| FLCN XhoI R 100-300       | TATGCG CTCGAG TTA GACCCAGCTTTCTGATTC                                        |                                  |
| FLCN XhoI R 100-210       | TATGCG CTCGAG TTA tgcctcaaacaccttgag                                        |                                  |
| FLCN XhoI R 100-260       | TATGCG CTCGAG TTA ccaggcaaaggaggtg                                          |                                  |
| FLCN-XhoI-R-1-100         | TATGCG CTCGAG TTA TTTATCATGGCTGATATATCCCGG                                  |                                  |
| FLCN XhoI R 100-220       | TATGCG CTCGAG TTA CTGAGCACGCTGTGGGCA                                        |                                  |
| FLCN XhoI R 100-230       | TATGCG CTCGAG TTA TAGGAATGGCGTGAAGGC                                        |                                  |
| FLCN XhoI R 100-241       | TATGCG CTCGAG TTA CAGCGAGCGGGCGGCGTT                                        |                                  |
| FLCN XhoI R 100-250       | TATGCG CTCGAG TTA CAGGTTGTCATCACTTGT                                        |                                  |
| FLCN-N-BamHI-F            | TATGCG GGATCC ATG gattacaaggatgacgacgataag gga<br>AATGCCATCGTGGCTCTC        |                                  |
| FLCN-N-XhoI-R             | CTCGGT CTCGAG TTA TGGCAGCTTCCGGGGCTGCCAGCT                                  |                                  |
| FLCN-C-BamHI-F            | TATGCG GGATCC ATG gattacaaggatgacgacgataag GGA<br>GTCTTCAAGTCCCTCCGGCACATGA |                                  |
| FLCN-A219N-F              | TGCCACAGCGTAACCAGAGGATGAAC                                                  |                                  |
| FLCN-A219N-R              | GTTTCATCCTCTGGTTACGCTGTGGGCA                                                |                                  |
| FLCN-Q220A-F              | CCACAGCGTGCTGCTAGGATGAACACA                                                 |                                  |
| FLCN-Q220A-R              | TGTGTTTCATCCTAGCAGCACGCTGTGG                                                |                                  |
| FLCN-R221A-F              | CAGCGTGCTCAGGCTATGAACACAGCC                                                 |                                  |

|                        |                                                                          |
|------------------------|--------------------------------------------------------------------------|
| FLCN-R221A-R           | GGCTGTGTTTCATAGCCTGAGCACGCTG                                             |
| FLCN-M222A-F           | CGTGCTCAGAGGGCTAACACAGCCTTC                                              |
| FLCN-M222A-R           | GAAGGCTGTGTTAGCCCTCTGAGCACG                                              |
| FLCN-N223A-F           | GCTCAGAGGATGGCTACAGCCTTCACG                                              |
| FLCN-N223A-R           | CGTGAAGGCTGTAGCCATCCTCTGAGC                                              |
| FLCN-T224A-F           | CAGAGGATGAACGCAGCCTTCACGCCA                                              |
| FLCN-T224A-R           | TGGCGTGAAGGCTGCGTTCATCCTCTG                                              |
| FLCN-A225N-F           | AGGATGAACACAACTTCACGCCATTC                                               |
| FLCN-A225N-R           | GAATGGCGTGAAGTTTGTGTTTCATCCT                                             |
| FLCN-F226A-F           | ATGAACACAGCCGCTACGCCATTCCTA                                              |
| FLCN-F226A-R           | TAGGAATGGCGTAGCGGCTGTGTTTCAT                                             |
| FLCN-T227A-F           | AACACAGCCTTCGCTCCATTCCTACAC                                              |
| FLCN-T227A-R           | GTGTAGGAATGGAGCGAAGGCTGTGTT                                              |
| FLCN-P228A-F           | ACAGCCTTCACGGCTTTCCTACACCAG                                              |
| FLCN-P228A-R           | CTGGTGTAGGAAAGCCGTGAAGGCTGT                                              |
| LDHA-FLAG-Kpnl-F       | TATGCG GGTACC ATG gattacaaggatgacgacgataag GGA gcaac<br>tctaaaggat cagct |
| LDHA-Xhol-R            | CTCGGT CTCGAG TCA aaactgcagttctttctgaatg                                 |
| LDHA-R106A-F           | cagcaagagggagaaagcgctcttaatttggtccag                                     |
| LDHA-R106A-R           | ctggaccaaattaagagcgctttctccctcttgctg                                     |
| LDHA-R106K-F           | cagcaagagggagaaagcaagcttaatttggtccag                                     |
| LDHA-R106K-R           | ctggaccaaattaagcttgctttctccctcttgctg                                     |
| LDHA-R106Q-F           | cagcaagagggagaaagccagcttaatttggtccag                                     |
| LDHA-R106Q-R           | Ctggaccaaattaagctggctttctccctcttgctg                                     |
| LDHB-FLAG-Kpn1-F       | TATGCG GGTACC ATG gattacaaggatgacgacgataag GGA<br>gcaactcttaaggaa        |
| LDHB-Xhol-R            | CTCGGT CTCGAG TCA caggtcttttaggtcctctg                                   |
| siRNA Oligonucleotides | Horizon Discovery/Dharmacon                                              |

|                    |                                                                                      |
|--------------------|--------------------------------------------------------------------------------------|
| Non-Targeting Pool | UGGUUUACAUGUUCGACUAA, UGGUUUACAUGUUGUGUGA,<br>UGGUUUACAUGUUUCUGA, UGGUUUACAUGUUUCCUA |
| FLCN SMARTPool     | AAAGAGACCUCCAUUAAAU, CGGGAUUAUCAGCCAUGA,<br>ACACAGCCUUCACGCCAUU, GAGGAUACCUUGGUCCAGA |
